# Supplementary material for: Roles of Small Polyetherimide Moieties on Thermal Stability and Fracture Toughness of Epoxy Blends
Source: MDPI journal article supplement (doi:10.3390/polym13193310), 2021-09-28
Supplement: s1 [file s1]

Supporting Information

# Roles of Small Polyetherimide Moieties on Thermal Stability and Fracture Toughness of Epoxy Blends

Seul-Yi Lee <sup>1</sup>, Min-Joo Kang <sup>1</sup>, Seong-Hwang Kim <sup>1</sup>, Kyong Yop Rhee <sup>2,\*</sup>, Jong-Hoon Lee <sup>1</sup> and Soo-Jin Park <sup>1,\*</sup>

<sup>1</sup> Department of Chemistry, Inha University, 100 Inharo, Incheon 22212, Korea; leesy1019@inha.ac.kr (S.-Y.L.); sa-rah lunar@naver.com (M.-J.K.); seonghwangkim@inha.edu (S.-H.K.); boy834@naver.com (J.-H.L.)

<sup>2</sup> Department of Mechanical Engineering, College of Engineering, Kyung Hee University, 1732 Deogyong-daero, Yongin 17104, Korea

\* Correspondence: rheeky@khu.ac.kr (K.Y.R.), sjpark@inha.ac.kr (S.-J.P.); Tel.: +82-31-201-2565 (K.Y.R.); +82-32-876-7234 (S.-J.P.)

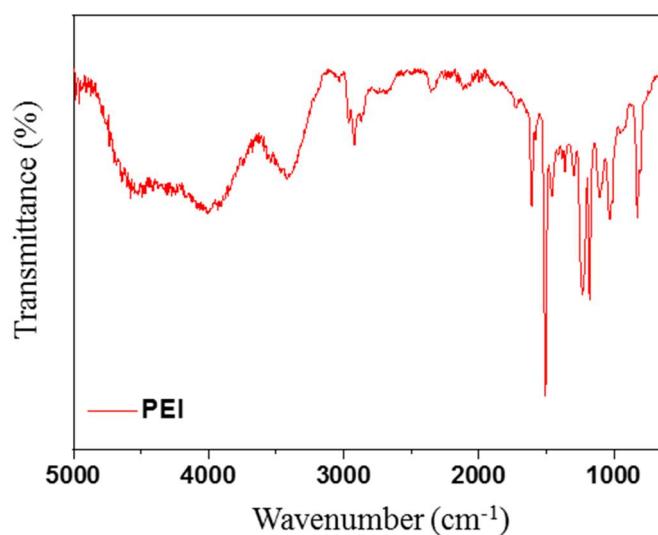

Figure S1. FT-IR spectrum of PEI.
